# Supplementary material for: Nine Mitochondrial Genomes of the Pyraloidea and Their Phylogenetic Implications (Lepidoptera)
Source: MDPI journal article supplement (doi:10.3390/insects12111039), 2021-11-18
Supplement: s1 [file s1]

**Table S4. The partitioning schemes and corresponding substitution models determined by PartitionFinder for the PCG123R dataset**

| Partitions | Models      | Data partitions              |
|------------|-------------|------------------------------|
| P1         | GTR+ I + G  | c1p1, c2p1                   |
| P2         | TVM + I + G | c1p2                         |
| P3         | TIM + I + G | n3p3, a6p3, c1p3, cbp3, c3p3 |
| P4         | GTR + I + G | n4lp1, n1p1, n4p1, n5p1      |
| P5         | GTR + I + G | n4lp2, n1p2, n4p2, n5p2      |
| P6         | GTR + G     | n1p3                         |
| P7         | TVM + I + G | c2p2, a6p2, c3p2, cbp2       |
| P8         | TVM + G     | c2p3, a8p3                   |
| P9         | GTR + I + G | n3p1, n2p1, a8p1, n6p1       |
| P10        | TVM + I + G | n2p2, n3p2                   |
| P11        | K81UF + G   | n2p3                         |
| P12        | GTR + I + G | c3p1, cbp1, a6p1             |
| P13        | TVM + I + G | n4p3, n4lp3, n5p3            |
| P14        | GTR + I + G | a8p2, n6p2                   |
| P15        | TIM + G     | n6p3                         |
| P16        | GTR + I + G | <i>rrnS</i> , <i>rrnL</i>    |
| P17        | GTR + I + G | tRNAs                        |

Note: c1–c3, n1–n6, a6, a8 and cb indicate the 13 PCGs; the p1, p2 and p3 indicate the first, second and third codon positions of each PCG respectively.
