# Supplementary material for: Nine Mitochondrial Genomes of the Pyraloidea and Their Phylogenetic Implications (Lepidoptera)
Source: MDPI journal article supplement (doi:10.3390/insects12111039), 2021-11-18
Supplement: s1 [file s1]

**Table S5. The partitioning schemes and corresponding substitution models determined by PartitionFinder for the PCGAA dataset**

| Partitions | Models            | Amino acid partitions |
|------------|-------------------|-----------------------|
| P1         | mtART + I + G + F | ATP6, ND2, ND3, CYTB  |
| P2         | mtREV + I + G+ F  | ATP8, ND6             |
| P3         | mtART + I + G     | COX1                  |
| P4         | mtART + I + G     | COX2, COX3            |
| P5         | mtART + I + G + F | ND1, ND4, ND4L, ND5   |
