# Supplementary material for: Nine Mitochondrial Genomes of the Pyraloidea and Their Phylogenetic Implications (Lepidoptera)
Source: MDPI journal article supplement (doi:10.3390/insects12111039), 2021-11-18
Supplement: s1 [file s1]

**Table S2. The partitioning schemes and corresponding substitution models determined by ModelFinder for the PCG123R dataset**

| Partitions | Models           | Data partitions              |
|------------|------------------|------------------------------|
| P1         | GTR + F + R4     | c1p1, c2p1                   |
| P2         | TVM + F + I + G4 | c1p2                         |
| P3         | TVM + F + R6     | c1p3, c3p3, a6p3, n6p3, a8p3 |
| P4         | GTR + F + R5     | n1p1, n4p1, n5p1, n4lp1      |
| P5         | GTR + F + R4     | n1p2, n4p2, n5p2, n4lp2      |
| P6         | TIM + F + R6     | n1p3, n5p3, n4lp3            |
| P7         | TVM + F + R4     | c2p2, c3p2, a6p2, cbp2       |
| P8         | TPM2 + F + R5    | c2p3, n3p3                   |
| P9         | GTR + F + R5     | n2p1, n3p1, n6p1, a8p1       |
| P10        | GTR + F + R5     | n2p2, n3p2, n6p2, a8p2       |
| P11        | TIM + F + R5     | n2p3                         |
| P12        | GTR + F + R5     | c3p1, a6p1, cbp1             |
| P13        | TPM3 + F + R5    | n4p3                         |
| P14        | TIM3 + F + R5    | cbp3                         |
| P15        | GTR + F + R6     | <i>rrnS</i> , <i>rrnL</i>    |
| P16        | GTR + F + R5     | tRNAs                        |

Note: c1–c3, n1–n6, a6, a8 and cb indicate the 13 PCGs; the p1, p2 and p3 indicate the first, second and third codon positions of each PCG respectively.
