# Supplementary material for: Nine Mitochondrial Genomes of the Pyraloidea and Their Phylogenetic Implications (Lepidoptera)
Source: MDPI journal article supplement (doi:10.3390/insects12111039), 2021-11-18
Supplement: s1 [file s1]

**Table S3. The partitioning schemes and corresponding substitution models determined by ModelFinder for the PCGAA dataset**

| <b>Partitions</b> | <b>Models</b>     | <b>Amino acid partitions</b> |
|-------------------|-------------------|------------------------------|
| P1                | mtMet + F + R6    | ATP6, ND2, ND3, ND6          |
| P2                | JTTDCMut + F + R5 | ATP8                         |
| P3                | mtMet + R5        | COX1, COX2, COX3, CYTB       |
| P4                | mtMet + F + R6    | ND1, ND4, ND4L, ND5          |
